# Supplementary material for: Mortality in relation to changes in physical activity in middle-aged to older Chinese: An 8-year follow-up of the Guangzhou Biobank Cohort Study
Source: PubMed Central journal article supplement — J Sport Health Sci. 2020 Aug 20;10(4):430–8. doi: 10.1016/j.jshs.2020.08.007 (PMC8343063; doi:10.1016/j.jshs.2020.08.007), 2020-08-20
Supplement: mmc1.pdf [file mmc1.pdf]

Supplementary Table 1. Hazard ratios (HRs) for all-cause and cardiovascular disease (CVD) mortality by changes in physical activity (PA) from 2003-8 (baseline) to 2012 (1<sup>st</sup> repeated examination), and followed up for mortality until December 2017 in 14,704 participants of the Guangzhou Biobank Cohort Study, excluding those with poor health at baseline.

| Change in PA                 | Person years | No. of deaths | Crude HR (95%CI)    | AHR <sup>a</sup> (95% CI) |
|------------------------------|--------------|---------------|---------------------|---------------------------|
| <b>All-cause</b>             |              |               |                     |                           |
| Low-low                      | 70           | 1             | 1.06 (0.15-7.54)    | 1.16 (0.16-8.31)          |
| Low-moderate                 | 2,211        | 20            | 0.65 (0.41-1.04)    | 0.80 (0.50-1.28)          |
| Low-high                     | 7,403        | 42            | 0.43 (0.31-0.61)*** | 0.69 (0.49-0.99)*         |
| Moderate-low                 | 1,036        | 17            | 1.08 (0.65-1.78)    | 1.27 (0.77-2.10)          |
| Moderate-moderate            | 10,265       | 147           | Ref.                | Ref.                      |
| Moderate-high                | 33,253       | 305           | 0.68 (0.56-0.82)*** | 0.87 (0.71-1.07)          |
| High-low                     | 1,468        | 25            | 1.12 (0.73-1.71)    | 1.31 (0.85-2.00)          |
| High-moderate                | 10,714       | 123           | 0.79 (0.62-1.00)    | 0.93 (0.73-1.18)          |
| High-high                    | 48,691       | 383           | 0.58 (0.48-0.70)*** | 0.81 (0.66-0.98)*         |
| Increase <sup>†</sup>        | 42,867       | 367           | 0.63 (0.52-0.77)*** | 0.85 (0.70-1.03)          |
| Decrease to low <sup>‡</sup> | 2,504        | 42            | 1.10 (0.78-1.55)    | 1.29 (0.91-1.82)          |
| <b>CVD</b>                   |              |               |                     |                           |
| Low-low                      | 70           | 1             | 2.93 (0.40-21.15)   | 3.17 (0.43-23.24)         |
| Low-moderate                 | 2,211        | 7             | 0.63 (0.29-1.39)    | 0.75 (0.34-1.66)          |
| Low-high                     | 7,403        | 10            | 0.29 (0.15-0.57)*** | 0.52 (0.26-1.02)          |
| Moderate-low                 | 1,036        | 8             | 1.30 (0.62-2.73)    | 1.53 (0.73-3.23)          |
| Moderate-moderate            | 10,265       | 55            | Ref.                | Ref.                      |
| Moderate-high                | 33,253       | 88            | 0.54 (0.38-0.75)*** | 0.69 (0.49-0.97)*         |
| High-low                     | 1,468        | 6             | 0.68 (0.29-1.59)    | 0.75 (0.32-1.74)          |
| High-moderate                | 10,714       | 43            | 0.72 (0.48-1.08)    | 0.84 (0.56-1.25)          |
| High-high                    | 48,691       | 123           | 0.51 (0.37-0.70)*** | 0.70 (0.51-0.97)*         |
| Increase <sup>†</sup>        | 42,867       | 105           | 0.50 (0.36-0.70)*** | 0.67 (0.48-0.93)*         |
| Decrease to low <sup>‡</sup> | 2,504        | 14            | 0.94 (0.52-1.68)    | 1.06 (0.59-1.91)          |

Ref: reference; AHR: adjusted hazard ratio; CI: confidence interval;

<sup>†</sup>: Increase: low-moderate, low-high, and moderate-high;

<sup>‡</sup>: Decrease to low: moderate-low and high-low;

<sup>a</sup>: Adjusted for sex, age, occupation, personal income, education, drinking, smoking and self-rated health

\*\*\*p<0.001,\*\*p<0.01,\*p<0.05

Supplementary Table 2. Hazard ratios (HRs) for all-cause and cardiovascular disease (CVD) mortality by changes in physical activity (PA) from 2003-8 (baseline) to 2012 (1<sup>st</sup> repeated examination), and followed up for mortality until December 2017 in 16,699 participants of the Guangzhou Biobank Cohort Study, excluding those with hard CVD history (self-reported stroke, MI or CHD) at baseline.

| Change in PA                 | Person years | No. of deaths | Crude HR (95%CI)    | AHR <sup>a</sup> (95% CI) |
|------------------------------|--------------|---------------|---------------------|---------------------------|
| <b>All-cause</b>             |              |               |                     |                           |
| Low-low                      | 69           | 2             | 2.07 (0.51-8.32)    | 3.52 (0.87-14.24)         |
| Low-moderate                 | 2,363        | 25            | 0.74 (0.48-1.12)    | 0.90 (0.59-1.37)          |
| Low-high                     | 8,160        | 50            | 0.45 (0.33-0.61)*** | 0.71 (0.52-0.98)*         |
| Moderate-low                 | 1,265        | 22            | 1.10 (0.71-1.72)    | 1.25 (0.80-1.95)          |
| Moderate-moderate            | 12,170       | 181           | Ref.                | Ref.                      |
| Moderate-high                | 38,421       | 386           | 0.71 (0.60-0.85)**  | 0.90 (0.75-1.07)          |
| High-low                     | 1,565        | 29            | 1.18 (0.79-1.74)    | 1.35 (0.91-2.00)          |
| High-moderate                | 12,140       | 150           | 0.82 (0.66-1.02)    | 0.94 (0.75-1.16)          |
| High-high                    | 54,344       | 474           | 0.62 (0.52-0.73)*** | 0.84 (0.71-1.00)          |
| Increase <sup>†</sup>        | 48,944       | 461           | 0.67 (0.56-0.80)*** | 0.87 (0.73-1.04)          |
| Decrease to low <sup>‡</sup> | 2,830        | 51            | 1.14 (0.84-1.56)    | 1.30 (0.95-1.78)          |
| <b>CVD</b>                   |              |               |                     |                           |
| Low-low                      | 69           | 2             | 6.03 (1.47-24.62)*  | 11.98 (2.89-49.71)**      |
| Low-moderate                 | 2,363        | 9             | 0.77 (0.38-1.55)    | 0.94 (0.47-1.89)          |
| Low-high                     | 8,160        | 14            | 0.37 (0.21-0.66)**  | 0.66 (0.37-1.18)          |
| Moderate-low                 | 1,265        | 8             | 1.10 (0.52-2.28)    | 1.23 (0.59-2.57)          |
| Moderate-moderate            | 12,170       | 64            | Ref.                | Ref.                      |
| Moderate-high                | 38,421       | 119           | 0.64 (0.47-0.86)**  | 0.81 (0.60-1.10)          |
| High-low                     | 1,565        | 8             | 0.88 (0.42-1.83)    | 0.97 (0.46-2.04)          |
| High-moderate                | 12,140       | 57            | 0.86 (0.60-1.24)    | 0.99 (0.69-1.42)          |
| High-high                    | 54,344       | 161           | 0.60 (0.45-0.81)**  | 0.84 (0.62-1.12)          |
| Increase <sup>†</sup>        | 48,944       | 142           | 0.60 (0.45-0.81)**  | 0.80 (0.59-1.08)          |
| Decrease to low <sup>‡</sup> | 2,830        | 16            | 0.97 (0.56-1.68)    | 1.09 (0.63-1.88)          |

Ref: reference; AHR: adjusted hazard ratio; CI: confidence interval;

<sup>†</sup>: Increase: low-moderate, low-high, and moderate-high;

<sup>‡</sup>: Decrease to low: moderate-low and high-low;

<sup>a</sup>: Adjusted for sex, age, occupation, personal income, education, drinking, smoking and self-rated health

\*\*\*p<0.001,\*\*p<0.01,\*p<0.05

Supplementary Table 3. Hazard ratios (HRs) for all-cause and cardiovascular disease (CVD) mortality by changes in physical activity (PA) from 2003-8 (baseline) to 2012 (1<sup>st</sup> repeated examination), and followed up for mortality until December 2017 in 17,784 participants of the Guangzhou Biobank Cohort Study, excluding deaths within the first 3 years.

| Change in PA                 | Person years | No. of deaths | Crude HR (95%CI)    | AHR <sup>a</sup> (95% CI) |
|------------------------------|--------------|---------------|---------------------|---------------------------|
| <b>All-cause</b>             |              |               |                     |                           |
| Low-low                      | 83           | 2             | 2.21 (0.55-8.91)    | 2.77 (0.68-11.24)         |
| Low-moderate                 | 2,507        | 21            | 0.73 (0.46-1.15)    | 0.93 (0.59-1.47)          |
| Low-high                     | 8,675        | 42            | 0.46 (0.32-0.64)*** | 0.75 (0.53-1.06)          |
| Moderate-low                 | 1,352        | 21            | 1.18 (0.75-1.87)    | 1.36 (0.86-2.14)          |
| Moderate-moderate            | 13,145       | 159           | Ref.                | Ref.                      |
| Moderate-high                | 41,650       | 336           | 0.72 (0.60-0.87)**  | 0.93 (0.76-1.13)          |
| High-low                     | 1,660        | 27            | 1.24 (0.82-1.86)    | 1.48 (0.98-2.23)          |
| High-moderate                | 13,225       | 134           | 0.82 (0.65-1.03)    | 0.94 (0.74-1.19)          |
| High-high                    | 58,535       | 399           | 0.61 (0.51-0.73)*** | 0.84 (0.69-1.01)          |
| Increase <sup>†</sup>        | 52,832       | 399           | 0.68 (0.57-0.82)*** | 0.91 (0.75-1.09)          |
| Decrease to low <sup>‡</sup> | 3,012        | 48            | 1.21 (0.88-1.67)    | 1.42 (1.03-1.97)*         |
| <b>CVD</b>                   |              |               |                     |                           |
| Low-low                      | 83           | 2             | 5.98 (1.46-24.47)*  | 7.82 (1.88-32.49)**       |
| Low-moderate                 | 2,507        | 7             | 0.66 (0.30-1.44)    | 0.82 (0.38-1.80)          |
| Low-high                     | 8,675        | 14            | 0.42 (0.23-0.74)**  | 0.75 (0.42-1.35)          |
| Moderate-low                 | 1,352        | 9             | 1.28 (0.63-2.57)    | 1.44 (0.72-2.91)          |
| Moderate-moderate            | 13,145       | 61            | Ref.                | Ref.                      |
| Moderate-high                | 41,650       | 114           | 0.66 (0.48-0.90)**  | 0.85 (0.62-1.16)          |
| High-low                     | 1,660        | 9             | 1.03 (0.51-2.07)    | 1.19 (0.59-2.41)          |
| High-moderate                | 13,225       | 53            | 0.83 (0.57-1.19)    | 0.94 (0.65-1.37)          |
| High-high                    | 58,535       | 142           | 0.57 (0.43-0.78)*** | 0.79 (0.58-1.08)          |
| Increase <sup>†</sup>        | 52,832       | 135           | 0.62 (0.46-0.84)**  | 0.83 (0.61-1.13)          |
| Decrease to low <sup>‡</sup> | 3,012        | 18            | 1.14 (0.67-1.93)    | 1.30 (0.77-2.21)          |

Ref: reference; AHR: adjusted hazard ratio; CI: confidence interval;

<sup>†</sup>: Increase: low-moderate, low-high, and moderate-high;

<sup>‡</sup>: Decrease to low: moderate-low and high-low;

<sup>a</sup>: Adjusted for sex, age, occupation, personal income, education, drinking, smoking and self-rated health

\*\*\*p<0.001,\*\*p<0.01,\*p<0.05

Supplementary Table 4. Hazard ratios (HRs) for all-cause and cardiovascular disease (CVD) mortality by changes in physical activity (PA) from 2003-8 (baseline) to 2012 (1<sup>st</sup> repeated examination), and followed up for mortality until December 2017 in 18,104 participants of the Guangzhou Biobank Cohort Study.

| Change in PA                 | Person years | No. of deaths | Crude HR (95%CI)    | AHR <sup>a</sup> (95% CI) |
|------------------------------|--------------|---------------|---------------------|---------------------------|
| <b>All-cause</b>             |              |               |                     |                           |
| Low-low                      | 83           | 2             | 1.66 (0.41-6.70)    | 2.38 (0.59-9.61)          |
| Low-moderate                 | 2,513        | 26            | 0.70 (0.46-1.05)    | 0.90 (0.60-1.36)          |
| Low-high                     | 8,697        | 54            | 0.44 (0.33-0.59)*** | 0.72 (0.53-0.98)*         |
| Moderate-low                 | 1,369        | 30            | 1.36 (0.92-1.99)    | 1.54 (1.05-2.26)*         |
| Moderate-moderate            | 13,221       | 203           | Ref.                | Ref.                      |
| Moderate-high                | 41,822       | 430           | 0.71 (0.60-0.83)*** | 0.90 (0.76-1.07)          |
| High-low                     | 1,669        | 32            | 1.18 (0.81-1.71)    | 1.43 (0.98-2.08)          |
| High-moderate                | 13,294       | 168           | 0.81 (0.66-0.99)*   | 0.93 (0.75-1.14)          |
| High-high                    | 58,749       | 516           | 0.60 (0.51-0.71)*** | 0.82 (0.69-0.97)*         |
| Increase <sup>†</sup>        | 53,032       | 510           | 0.66 (0.56-0.78)*** | 0.88 (0.74-1.04)          |
| Decrease to low <sup>‡</sup> | 3,038        | 62            | 1.26 (0.95-1.67)    | 1.48 (1.11-1.97)**        |
| <b>CVD</b>                   |              |               |                     |                           |
| Low-low                      | 83           | 2             | 4.79 (1.17-19.51)*  | 7.42 (1.81-30.53)**       |
| Low-moderate                 | 2,513        | 9             | 0.69 (0.35-1.38)    | 0.89 (0.44-1.78)          |
| Low-high                     | 8,697        | 18            | 0.42 (0.25-0.71)**  | 0.77 (0.46-1.30)          |
| Moderate-low                 | 1,369        | 16            | 1.95 (1.13-3.35)*   | 2.20 (1.28-3.78)**        |
| Moderate-moderate            | 13,221       | 73            | Ref.                | Ref.                      |
| Moderate-high                | 41,822       | 139           | 0.65 (0.49-0.86)**  | 0.84 (0.63-1.12)          |
| High-low                     | 1,669        | 11            | 1.08 (0.57-2.04)    | 1.28 (0.68-2.42)          |
| High-moderate                | 13,294       | 64            | 0.84 (0.60-1.18)    | 0.97 (0.69-1.36)          |
| High-high                    | 58,749       | 178           | 0.59 (0.45-0.77)*** | 0.81 (0.61-1.07)          |
| Increase <sup>†</sup>        | 53,032       | 166           | 0.62 (0.47-0.81)**  | 0.83 (0.63-1.10)          |
| Decrease to low <sup>‡</sup> | 3,038        | 27            | 1.47 (0.94-2.29)    | 1.70 (1.09-2.65)*         |

Ref: reference; AHR: adjusted hazard ratio; CI: confidence interval;

<sup>†</sup>: Increase: low-moderate, low-high, and moderate-high;

<sup>‡</sup>: Decrease to low: moderate-low and high-low;

<sup>a</sup>: Adjusted for sex, age, occupation, personal income, education, alcohol use, amount of smoking and self-rated health

\*\*\*p<0.001,\*\*p<0.01,\*p<0.05

Supplementary Table 5. Hazard ratios (HRs) for all-cause and cardiovascular disease (CVD) mortality by changes in physical activity (PA) from 2003-8 (baseline) to 2012 (1<sup>st</sup> repeated examination), and followed up for mortality until December 2017 in 18,104 participants of the Guangzhou Biobank Cohort Study.

| Change in PA                 | Person years | No. of deaths | Crude HR (95%CI)    | AHR <sup>a</sup> (95% CI) |
|------------------------------|--------------|---------------|---------------------|---------------------------|
| <b>All-cause</b>             |              |               |                     |                           |
| Low-low                      | 83           | 2             | 1.66 (0.41-6.70)    | 2.06 (0.51-8.33)          |
| Low-moderate                 | 2,513        | 26            | 0.70 (0.46-1.05)    | 0.88 (0.59-1.33)          |
| Low-high                     | 8,697        | 54            | 0.44 (0.33-0.59)*** | 0.71 (0.52-0.97)*         |
| Moderate-low                 | 1,369        | 30            | 1.36 (0.92-1.99)    | 1.54 (1.05-2.27)*         |
| Moderate-moderate            | 13,221       | 203           | Ref.                | Ref.                      |
| Moderate-high                | 41,822       | 430           | 0.71 (0.60-0.83)*** | 0.90 (0.76-1.07)          |
| High-low                     | 1,669        | 32            | 1.18 (0.81-1.71)    | 1.42 (0.97-2.06)          |
| High-moderate                | 13,294       | 168           | 0.81 (0.66-0.99)*   | 0.94 (0.76-1.15)          |
| High-high                    | 58,749       | 516           | 0.60 (0.51-0.71)*** | 0.83 (0.70-0.98)*         |
| Increase <sup>†</sup>        | 53,032       | 510           | 0.66 (0.56-0.78)*** | 0.87 (0.74-1.03)          |
| Decrease to low <sup>‡</sup> | 3,038        | 62            | 1.26 (0.95-1.67)    | 1.48 (1.11-1.97)**        |
| <b>CVD</b>                   |              |               |                     |                           |
| Low-low                      | 83           | 2             | 4.79 (1.17-19.51)*  | 5.95 (1.44-24.64)*        |
| Low-moderate                 | 2,513        | 9             | 0.69 (0.35-1.38)    | 0.88 (0.44-1.77)          |
| Low-high                     | 8,697        | 18            | 0.42 (0.25-0.71)**  | 0.77 (0.45-1.29)          |
| Moderate-low                 | 1,369        | 16            | 1.95 (1.13-3.35)*   | 2.22 (1.29-3.82)**        |
| Moderate-moderate            | 13,221       | 73            | Ref.                | Ref.                      |
| Moderate-high                | 41,822       | 139           | 0.65 (0.49-0.86)**  | 0.83 (0.62-1.11)          |
| High-low                     | 1,669        | 11            | 1.08 (0.57-2.04)    | 1.30 (0.68-2.45)          |
| High-moderate                | 13,294       | 64            | 0.84 (0.60-1.18)    | 0.97 (0.69-1.36)          |
| High-high                    | 58,749       | 178           | 0.59 (0.45-0.77)*** | 0.82 (0.62-1.08)          |
| Increase <sup>†</sup>        | 53,032       | 166           | 0.62 (0.47-0.81)**  | 0.83 (0.63-1.09)          |
| Decrease to low <sup>‡</sup> | 3,038        | 27            | 1.47 (0.94-2.29)    | 1.72 (1.10-2.69)*         |

Ref: reference; AHR: adjusted hazard ratio; CI: confidence interval;

<sup>†</sup>: Increase: low-moderate, low-high, and moderate-high;

<sup>‡</sup>: Decrease to low: moderate-low and high-low;

<sup>a</sup>: Adjusted for sex, age, occupation, personal income, education, alcohol use, smoking, self-rated health and self-reported CVD

\*\*\*p<0.001,\*\*p<0.01,\*p<0.05
